# Supplementary material for: Omics and bioinformatics applied to vaccine development against Borrelia
Source: Royal Society of Chemistry journal article supplement (doi:10.1039/c8mo00130h), 2018-08-03
Supplement: c8mo00130h2.pdf [file c8mo00130h2.pdf]

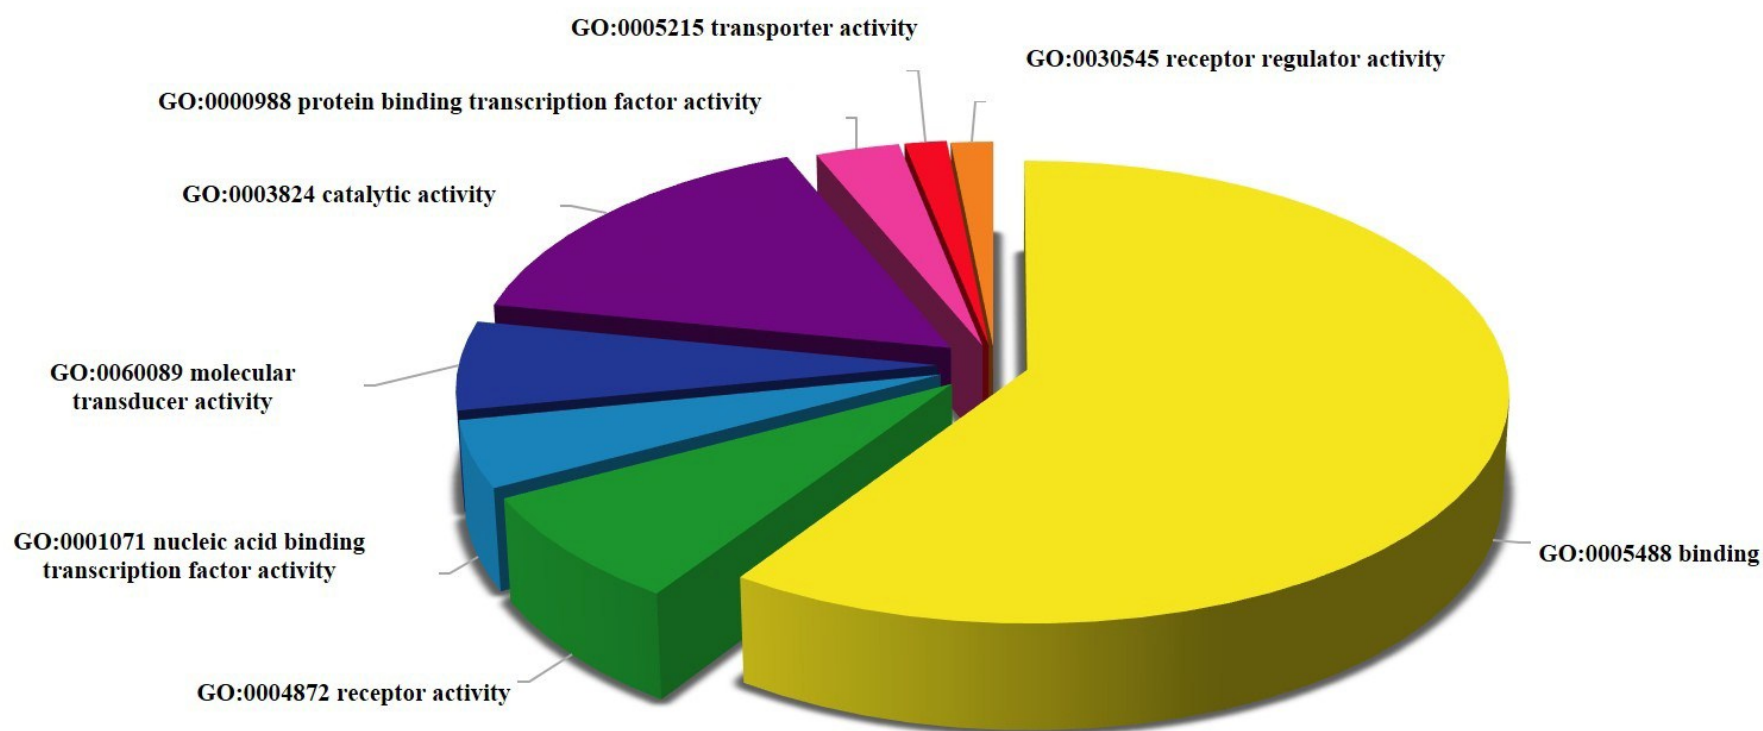

| Level GO | Term (Acc) | Term (Name)                                   | #Seq | Score | Parents (Acc) |
|----------|------------|-----------------------------------------------|------|-------|---------------|
| 2        | GO:0044699 | single-organism process                       | 38   | 39,66 | GO:0008150    |
| 2        | GO:0050896 | response to stimulus                          | 39   | 29,33 | GO:0008150    |
| 2        | GO:0009987 | cellular process                              | 32   | 24,08 | GO:0008150    |
| 2        | GO:0002376 | immune system process                         | 33   | 20,05 | GO:0008150    |
| 2        | GO:0065007 | biological regulation                         | 36   | 15,48 | GO:0008150    |
| 2        | GO:0032502 | developmental process                         | 18   | 9,25  | GO:0008150    |
| 2        | GO:0008152 | metabolic process                             | 33   | 9,13  | GO:0008150    |
| 2        | GO:0032501 | multicellular organismal process              | 19   | 7,61  | GO:0008150    |
| 2        | GO:0023052 | signaling                                     | 24   | 6,42  | GO:0008150    |
| 2        | GO:0022610 | biological adhesion                           | 10   | 4,49  | GO:0008150    |
| 2        | GO:0051179 | localization                                  | 20   | 4,19  | GO:0008150    |
| 2        | GO:0051704 | multi-organism process                        | 11   | 3,95  | GO:0008150    |
| 2        | GO:0071840 | cellular component organization or biogenesis | 12   | 2,05  | GO:0008150    |
| 2        | GO:0001906 | cell killing                                  | 5    | 1,53  | GO:0008150    |
| 2        | GO:0000003 | reproduction                                  | 6    | 1,24  | GO:0008150    |
| 2        | GO:0040011 | locomotion                                    | 7    | 1     | GO:0008150    |
| 2        | GO:0040007 | growth                                        | 2    | 0,68  | GO:0008150    |
| 2        | GO:0048511 | rhythmic process                              | 1    | 0,22  | GO:0008150    |
