# Supplementary material for: Omics and bioinformatics applied to vaccine development against Borrelia
Source: Royal Society of Chemistry journal article supplement (doi:10.1039/c8mo00130h), 2018-08-03
Supplement: c8mo00130h7.pdf [file c8mo00130h7.pdf]

Supplementary table S4: B-cell epitopes analysis from full length proteins using BCPred and Antibody Epitope Prediction at IEDB and Lbtope.

| FBCpres      |                            |       | Antibody Epitope Prediction at IEDB |                            | Lbtope                    |                        |            | BcePred       |                                           |
|--------------|----------------------------|-------|-------------------------------------|----------------------------|---------------------------|------------------------|------------|---------------|-------------------------------------------|
| Position     | Epitope                    | Score | Position                            | Epitope                    | position                  | Epitope                | SMV score  | % probability | Epitope                                   |
| >borr O51369 |                            |       | >borr O51369                        |                            | >borr O51369              |                        |            | >borr O51369  |                                           |
|              | 577VANHAPHGGPIVLPV         | 1     |                                     | <b>49DREKIGDTSWENGVA</b>   | 267                       | SKDSGTNSDTKASVA        | 0.75571822 | 75.19         | FLKKDLVFLPEVNS                            |
|              | 317GIGPDGPNFAEHFPY         | 1     |                                     | <b>228KDIDEKRFEGKRVIYK</b> | 397                       | LARRSVPEWLRPVMP        | 0.7965397  | 76.55         | GLTPGLVGGV                                |
|              | 520PKLFENEKESGKIA          | 1     |                                     |                            | 402                       | VPEWLRPVMPIFVIP        | 0.84045408 | 78.02         | PHFIGDVHFIGDVVKTSFISLLYIKGSVKTSFISLLYIKGS |
|              | <b>265FKSKDSGTNSDTKAS</b>  | 1     |                                     |                            | 222                       | <b>VILAVDKDIDEKRFE</b> | 0.85823931 | 78.61         | PPVNLIFLICMSK                             |
|              | 544EGAIPFAASDPGRVI         | 0.999 |                                     |                            | 400                       | RSVPEWLRPVMPIFV        | 0.93261904 | 81.09         | LRPVMPIFVIPLISTIIVGFFMLYFGVYIG            |
|              | 169VTACPVGVAHTYIAA         | 0.999 |                                     |                            | 398                       | ARRSVPEWLRPVMPI        | 0.97396942 | 82.47         | KRVYKVSTVKA                               |
|              | 293SGVSPMIPVVASGGI         | 0.994 |                                     |                            | <b>264FKSKDSGTNSDTKAS</b> |                        | 0.98370803 | 82.79         | FLFGVGLIPQVPEI                            |
|              | <b>240VYKVSTVKAINNTEN</b>  | 0.982 |                                     |                            | 262                       | APVFKSKDSGTNSDT        | 0.98457366 | 82.82         | HGGPIVLPVIDN                              |
|              | 208ENALTEEEIKNASVV         | 0.974 |                                     |                            | 399                       | RRSVPEWLRPVMPIF        | 0.99452187 | 83.15         | LVIFLKSLKL                                |
|              | <b>84GSGVKWSEENPPVNL</b>   | 0.94  |                                     |                            | 401                       | SVPEWLRPVMPIFVI        | 10.591.122 | 85.30         |                                           |
|              | <b>138TTDDIYIYIENVQRK</b>  | 0.927 |                                     |                            | 266                       | KSKDSGTNSDTKASV        | 10.880.201 | 86.27         |                                           |
|              | <b>48LDREKIGDTSWENGV</b>   | 0.872 |                                     |                            | 263                       | PVFKSKDSGTNSDTK        | 11.619.124 | 88.73         |                                           |
|              | 185KIENEAKKQGYRIV          | 0.83  |                                     |                            | 264                       | VFKSKDSGTNSDTKA        | 1.320.584  | 94.02         |                                           |
|              | 470MITVDMGGPFNKVAF         | 0.745 |                                     |                            |                           |                        |            |               |                                           |
|              | 503AAIPVPPMAMGLATF         | 0.693 |                                     |                            |                           |                        |            |               |                                           |
| >borr Q44767 |                            |       | >borr Q44767                        |                            | >borr Q44767              |                        |            | >borr Q44767  |                                           |
|              | <b>50SGASRPTDARGGTNP</b>   | 1     |                                     |                            | 251                       | NEGALASLNGQPGQK        | 0.78718278 | 76.24         | FGNVSVLELRVVKDL                           |
|              | 219LRVVKDLNTPNLWNA         | 1     |                                     |                            |                           |                        |            |               | DILQIPITFNVL                              |
|              | <b>365AKSGDTNFBVETSNSG</b> | 1     |                                     |                            |                           |                        |            |               |                                           |
|              | 423NAKTITTSQQLQEL          | 1     |                                     |                            |                           |                        |            |               |                                           |
|              | 238NGEQNSNFTLGFENE         | 0.997 |                                     |                            |                           |                        |            |               |                                           |
|              | <b>118FDVDSDRHLVNPANG</b>  | 0.995 |                                     |                            |                           |                        |            |               |                                           |
|              | 202VVNKSLYDSFGNVSV         | 0.99  |                                     |                            |                           |                        |            |               |                                           |

|                            |       |                             |                            |              |                                    |                 |
|----------------------------|-------|-----------------------------|----------------------------|--------------|------------------------------------|-----------------|
| 20DVVGNNIANVNTIGF          | 0.988 |                             |                            |              |                                    |                 |
| 314TKAIIQDGYGMGYME         | 0.978 |                             |                            |              |                                    |                 |
| 339VGIYSNGIRRDLGKI         | 0.942 |                             |                            |              |                                    |                 |
| 170 <b>STKNVTFACNLDKRL</b> | 0.864 |                             |                            |              |                                    |                 |
| 97SGNGFFILKEGKNLF          | 0.778 |                             |                            |              |                                    |                 |
| 135 <b>IQGWMARDLEGEKVI</b> | 0.767 |                             |                            |              |                                    |                 |
| 72 <b>NVASIDTIHTQGAFAQ</b> | 0.745 |                             |                            |              |                                    |                 |
| >borr O51039               |       | >borr O51039                |                            | >borr O51039 |                                    |                 |
| 2LKDLNTNQGLKPWRV           | 0.998 |                             |                            |              | RVESVFYCVIVLIFIG                   |                 |
| 117 <b>RYKVDSSVINDVNS</b>  | 0.993 |                             |                            |              | ISIVLGFLVYPVYTFI                   |                 |
| 90YYSVTVLMKQLPYYQ          | 0.881 |                             |                            |              | FKVPKFLIVFIHFFLLFSFVYVYVSVTVLMKQLP |                 |
| 328 <b>VIVDNVSWLKSFSVF</b> | 0.825 |                             |                            |              | FTSSLVVVFLLYFLLSEIHVF              |                 |
|                            |       |                             |                            |              | AVFFIVITSLIQFYPNLNIVLYVFIYNT       |                 |
|                            |       |                             |                            |              | LWGIVGLLISYPFTVIVKVIVDNVS          |                 |
|                            |       |                             |                            |              | LDISPFLLLCFLFFWG                   |                 |
|                            |       |                             |                            |              | YLGIKILVSCLTGILVFIGLTLF            |                 |
|                            |       |                             |                            |              | VLSRYKVDSSVI                       |                 |
| >borr P70859               |       | >borr P70859                |                            | >borr P70859 |                                    |                 |
| 460SGPEGAYDYKNIDTT         | 1     | 193 <b>QISKSQAMKDNPNLDM</b> | 48IPLYAPQLNRAKKQG          | 0.75811397   | 75.27                              | VYNPEDQSIRKRL   |
| 256 <b>EATNGPTRTRWNILW</b> | 1     | 316 <b>HEAGRGMDKKNGRSF</b>  | 312 <b>VNEIHEAGRGMDKKN</b> | 0.76250669   | 75.42                              | HEAGRGMDKKNGR   |
| 383 <b>TNSNEIVEIPYNAPD</b> | 1     |                             | 27HNLNATKPGYSRQR           | 0.76561938   | 75.52                              | LKLTDDRGRYDTNGN |
| 339 <b>DDRGRYDTNGNGQFD</b> | 0.998 |                             | 145LERGKSFCEGIRNRF         | 0.7665948    | 75.55                              |                 |
| 65GQGIVVQSIDRVKDE          | 0.997 |                             | 36GYSRQRVTMKTEIPL          | 0.76997335   | 75.67                              |                 |
| 426KAVKEQEDENITFKI         | 0.997 |                             | 286 <b>LLNIRDEEIKNEINE</b> | 0.77716031   | 75.91                              |                 |
| 103SILEDVYNPEDQSI          | 0.996 |                             | 146ERGKSFCEGIRNRFH         | 0.77805577   | 75.94                              |                 |
| 564SEITKESQSILKDL          | 0.996 |                             | 33TKPGYSRQRVTMKTE          | 0.78176253   | 76.06                              |                 |
| 289 <b>IRDEEIKNEINELNN</b> | 0.955 |                             | 319 <b>GRGMDKKNGRSFFSQ</b> | 0.79627793   | 76.54                              |                 |
| 196 <b>KSQAMKDNPNLMDA</b>  | 0.906 |                             | 356 <b>HIFKINSTNEIFPEE</b> | 0.8127464    | 77.09                              |                 |
| 404 <b>NRINNSNAQVTARIN</b> | 0.871 |                             | 324KKNGRSFFSQELKLT         | 0.83929955   | 77.98                              |                 |
| 444EDSGSFLTKYTGILN         | 0.859 |                             | 49PLYAPQLNRAKKQGQ          | 0.85041325   | 78.35                              |                 |

|                    |              |                     |                     |            |       |                        |
|--------------------|--------------|---------------------|---------------------|------------|-------|------------------------|
| 497VADIHSDPSKIASG  | 0.855        |                     | 287LNIRDEEIKNEINEL  | 0.8694203  | 78.98 |                        |
| 542KNLTLNDYFANTASN | 0.769        |                     | 288NIRDEEIKNEINELN  | 0.8694203  | 78.98 |                        |
| 357IFKINSTNEIFPEEK | 0.703        |                     | 47EIPLYAPQLNRAKKQ   | 0.87095135 | 79.03 |                        |
|                    |              |                     | 357IFKINSTNEIFPEEK  | 0.88313794 | 79.44 |                        |
|                    |              |                     | 143IILERGKSFCEGIRN  | 0.89209515 | 79.74 |                        |
|                    |              |                     | 144IILERGKSFCEGIRNR | 0.93064413 | 81.02 |                        |
|                    |              |                     | 46TEIPLYAPQLNRAKK   | 0.96682875 | 82.23 |                        |
|                    |              |                     | 35PGYSRQRVTMKTEIP   | 10.031.194 | 83.44 |                        |
|                    |              |                     | 358FKINSTNEIFPEEKL  | 1.008.005  | 83.60 |                        |
|                    |              |                     | 360INSTNEIFPEEKLG   | 10.428.914 | 84.76 |                        |
|                    |              |                     | 359KINSTNEIFPEEKL   | 11.814.686 | 89.38 |                        |
| >borr O50957       | >borr O50957 | >borr O50957        | >borr O50957        |            |       | >borr O50957           |
| 53NFEDKSGDLSTSDEK  | 1            |                     | 129YSSLDYKKENIEKLG  | 0.78267788 | 76.09 | TNPGENTQNFKEDKSGDLSTSD |
| 182QNGVENLSQEEKSL  | 1            |                     |                     |            |       |                        |
| 28FSKIDPKANANTKPK  | 0.998        |                     |                     |            |       |                        |
| 218LKVYNQNTQDNEKIL | 0.994        |                     |                     |            |       |                        |
| 237NKYYKDFDTLKPAFY | 0.968        |                     |                     |            |       |                        |
| 80GKELEDQKKEENIQI  | 0.929        |                     |                     |            |       |                        |
| 101KFDFLSTFKVGPYDL | 0.883        |                     |                     |            |       |                        |
| 166ISWGIQFQIEQNLEL | 0.797        |                     |                     |            |       |                        |
| >borr O51550       | >borr O51550 | >borr O51550        | >borr O51550        |            |       | >borr O51550           |
| 89ASYYNAPPNSSLMFL  | 1            | 267EKGINGFGEKMRSSI  | 49KPNLVFPPASLTKIV   | 0.75875887 | 75.29 | KGLSVSSGND             |
| 227IYDYPYSDGIKTGYI | 1            | 304EKVYNGTVDTVALFSK | 44ILYSKKPNLVFPAS    | 0.76941125 | 75.65 | FVEPSGYSSN             |
| 348SGDMPVGRAMIFLEN | 0.999        |                     | 50PNLVFPASLTKIVT    | 0.82123603 | 77.37 | LVATAKKGER             |
| 319KEPFYIILTKDEFDK | 0.993        |                     | 103LEKQIVNFEEILKG   | 0.88370581 | 79.46 |                        |
| 47SKKPNLVFPPASLTK  | 0.985        |                     | 102FLEKQIVNFEEILK   | 0.90243678 | 80.08 |                        |
| 155FNMHFVEPSGYSSN  | 0.958        |                     | 48KKPNLVFPPASLTKI   | 0.92663241 | 80.89 |                        |
| 116KGLSVSSGNDSSIAI | 0.793        |                     | 45LYSKKPNLVFPASL    | 11.650.735 | 88.84 |                        |
|                    |              |                     | 104EKQIVNFEEILKGL   | 11.653.939 | 88.85 |                        |
|                    |              |                     | 46YSKKPNLVFPASLT    | 12.641.091 | 92.14 |                        |

|                    |              |                     |                     |            |        |                                          |
|--------------------|--------------|---------------------|---------------------|------------|--------|------------------------------------------|
|                    |              |                     | 47SKKPNLVFPASLTK    | 13.064.743 | 93.55  |                                          |
| >borr O51310       | >borr O51310 | >borr O51310        | >borr O51310        |            |        | >borr O51310                             |
| 87AKKEKREINEEELKK  | 1            |                     | 139DLLARLIQGSQISLS  | 0.80002799 | 76.67  | NSLEKQNEENNSKLE                          |
| 4LEKQNEENNSKLERR   | 1            |                     | 105DIKRKIENEVQIIDK  | 0.83344304 | 77.78  |                                          |
| 169GSIAGFFGGLPDKII | 0.996        |                     | 94EINEEELKKLEDIKR   | 10.107.861 | 83.69  |                                          |
| 308IATFVEYPWKVFIPA | 0.951        |                     | 91EKREINEEELKKLED   | 11.231.995 | 87.44  |                                          |
| 290GLGISAPMTSWGELV | 0.932        |                     | 93REINEEELKKLEDIK   | 11.650.446 | 88.83  |                                          |
| 244AAKTLGATNQRIILK | 0.925        |                     | 92KREINEEELKKLEDI   | 11.835.816 | 89.45  |                                          |
| 114QIIDKKEVKIHKRVY | 0.886        |                     |                     |            |        |                                          |
| 71AGELWYNKEKKFIEK  | 0.881        |                     |                     |            |        |                                          |
| >borr O51272       | >borr O51272 | >borr O51272        | >borr O51272        |            |        | >borr O51272                             |
| 709DEIFIDSVKEPDLVA | 0.998        | 674LNPFXPRIQGGFLKE  | 196QVFDEKKNIIINDEEY | 0.78742406 | 76.31  | FYQYFQFLFFFMLSVISFLFV                    |
| 411IAPIPGREAVGIEIP | 0.998        | 736LEIVKTTRKASASYL  | 191DLKDSQVFDEKKNII  | 0.81774109 | 77.39  | LTPLSNVFFVFNLLGQILLNVFSFLSFYLIVYPIVNW    |
| 683GGFLKEREVRLVEE  | 0.996        | 770DMGYVGPVNGSKPREV | 194DSQVFDEKKNINDE   | 0.84299387 | 78.10  | NYTVILFFTLIFLIKI                         |
| 183KVYGDSVDDLKDSQV | 0.996        |                     | 219FLRNNKKPSNINLKD  | 0.86383619 | 78.92  | YFIKIFLINFGIVLGNFFIFTLILEFVWVIYLNYPVFKDV |
| 332KEIKNDVEDIEYDKE | 0.995        |                     | 195SQVFDEKKNINDEE   | 0.86987595 | 79.00  | NIVFDLVNSPHLLI                           |
| 539RWCLDEMERRYVLLD | 0.993        |                     | 222NNKKPSNINLDKTIF  | 0.92948087 | 80.110 | PHLLTPVITDVK                             |
| 372KGPVVTMYAVRPDKG | 0.99         |                     | 193KDSQVFDEKKNIIND  | 0.91568542 | 80.122 | ERRYVLLDNLLVRDIS                         |
| 260DENVDEIDESCEYKY | 0.99         |                     | 221RNNKKPSNINLDKTI  | 11.390.181 | 87.99  | LMILPYLVIIIIDEF                          |
| 456EISGENIVFDLVNSP | 0.988        |                     | 192LKDSQVFDEKKNIIN  | 0.92602261 | 80.997 | RPSVDVITGVIK                             |
| 772GYVGPVNGSKPREVL | 0.979        |                     | 220LRNNKKPSNINLDKT  | 0.93069215 | 81.02  | REVYRLVEEV                               |
| 725GPSDEPMFDEALEIV | 0.969        |                     | 190DDLKDSQVFDEKKNI  | 0.94564302 | 81.65  |                                          |
| 59VYPIVNWYAYKKHIF  | 0.958        |                     | 188SVDDLKDSQVFDEKK  | 0.994036   | 83.13  |                                          |
| 221RNNKKPSNINLDKTI | 0.939        |                     |                     |            |        |                                          |
| 288KVKACEIRTKGIISQ | 0.864        |                     |                     |            |        |                                          |
| >borr O51278       | >borr O51278 | >borr O51278        | >borr O51278        |            |        | >borr O51278                             |
| 108SLDSRDYGFIKIDNI | 0.831        |                     |                     |            |        | KHQKYLWKT                                |
|                    |              |                     |                     |            |        | PEDHYLVIGE                               |
| >borr O51161       | >borr O51161 | >borr O51161        | >borr O51161        |            |        | >borr O51161                             |
| 149YPRNTTSNITGFVG  | 1            | 150PFRNTTSNITGFVGT  | 641SQNGEILSMVQFPQY  | 0.75257424 | 75.09  | AITLLTIYKYFTL                            |

|                    |       |                      |                    |            |       |                |
|--------------------|-------|----------------------|--------------------|------------|-------|----------------|
| 262KNLSSSLTYEPGSIN | 1     | 360GEKVGVPFPGETKGL   | 970PKAETNYKNKTYLPN | 0.76168274 | 75.39 | QPKYIIVYRYPK   |
| 425SNDKGENIKEFDKEE | 0.999 | 559KIKIPKAETNYKNKTY  | 830KISNDKGENIKEFDK | 0.78425169 | 76.14 |                |
| 32TLMAFNNSPDNTISL  | 0.999 |                      | 456NDIAKRGTIYDRNGK | 0.79127598 | 76.38 |                |
| 572KTYLPNFINLSKREA | 0.996 |                      | 586ILGKDKTKQFLNEE  | 0.8166778  | 77.22 |                |
| 342TEKVSNEYFYKLLD  | 0.992 |                      | 832SNDKGENIKEFDKEE | 0.8948739  | 79.83 |                |
| 233NSQNGEILSMVQFPQ | 0.988 |                      | 968KIPKAETNYKNKTYL | 0.91772398 | 80.59 |                |
| 181GKDKTKQFLNEEPE  | 0.98  |                      | 587LGKDKTKQFLNEEP  | 0.92653411 | 80.88 |                |
| 307PSGEKITIKTLNPPY | 0.975 |                      | 704LDNGIYQKQFPSGEK | 0.92825308 | 80.94 |                |
| 1MTKRMLNNTYRIKTI   | 0.953 |                      | 966KIKIPKAETNYKNKT | 0.94129394 | 81.38 |                |
| 54RGTIYDRNGKPIAFS  | 0.897 |                      | 833NDKGENIKEFDKEEI | 0.94861824 | 81.62 |                |
| 609KQSISPNTKLEDITE | 0.89  |                      | 829KKISNDKGENIKEFD | 0.97647493 | 82.55 |                |
| 533PMAKEIIEFIEHQON | 0.841 |                      | 969IPKAETNYKNKTYLP | 0.99935355 | 83.31 |                |
| 112FLYIKRKIKREESDL | 0.779 |                      | 705DNGIYQKQFPSGEKI | 10.253.923 | 84.18 |                |
|                    |       |                      | 967IKIPKAETNYKNKTY | 12.909.797 | 93.03 |                |
| >borr G5IXI6       |       | >borr G5IXI6         | >borr G5IXI6       |            |       | >borr G5IXI6   |
| 98SDISSTGKPDSTGS   | 1     | 208GAAAAGHDSEAASKAAG | 22KSQVADKDDPTNKFY  | 0.75336818 | 75.11 | LLTTFVFINCKSQV |
| 297FAVKDGEKEKAEGAI | 1     |                      | 63FKSDPKKSDVKTYFT  | 0.75405887 | 75.14 | KFYQSVIQLG     |
| 243AAEQDGKKPEEAKNP | 1     |                      | 58AEAFGFKSDPKKSDV  | 0.77197738 | 75.73 |                |
| 340KVGDSVKAASKETPP | 0.998 |                      | 55GLVAEAFGFKSDPKK  | 0.77775182 | 75.93 |                |
| 20NCKSQVADKDDPTNK  | 0.998 |                      | 142SSGTAAIGEVVADAD | 0.79532258 | 76.51 |                |
| 81AKLEKTKTDLNSLPK  | 0.997 |                      | 143SGTAAIGEVVADADA | 0.8139826  | 77.13 |                |
| 64KSDPKKSDVKTYFTT  | 0.994 |                      | 243AAEQDGKKPEEAKNP | 0.81668577 | 77.22 |                |
|                    |       |                      | 59EAFGFKSDPKKSDVK  | 0.81956304 | 77.32 |                |
|                    |       |                      | 94PKEKSDISSTGKPD   | 0.83773452 | 77.92 |                |
|                    |       |                      | 64KSDPKKSDVKTYFTT  | 0.8384193  | 77.95 |                |
|                    |       |                      | 26ADKDDPTNKFYQSVI  | 0.84652944 | 78.22 |                |
|                    |       |                      | 93LPKEKSDISSTGKP   | 0.84976243 | 78.33 |                |
|                    |       |                      | 23SQVADKDDPTNKFYQ  | 0.89586729 | 79.86 |                |
|                    |       |                      | 62GFKSDPKKSDVKTYF  | 0.90027838 | 80.01 |                |
|                    |       |                      | 66DPKKSDVKTYFTTVA  | 0.90277844 | 80.09 |                |

|                          |                   |              |
|--------------------------|-------------------|--------------|
| 60AFGFKSDPKKSDVKT        | 0.9050044         | 80.17        |
| 21CKSQVADKDDPTNKF        | 0.9444292         | 81.48        |
| 61FGFKSDPKKSDVKTY        | 0.97045228        | 82.35        |
| 19INCKSQVADKDDPTN        | 10.815.462        | 86.05        |
| 20NCKSQVADKDDPTNK        | 11.993.202        | 89.98        |
| <b>20NCKSQVADKDDPTNK</b> | <b>11.993.202</b> | <b>89.98</b> |

>borr|O50835

>borr|O50835

>borr|O50835

>borr|O50835

|                     |       |
|---------------------|-------|
| 190YYLDEYDEEDEEEIR  | 1     |
| 174NSISYTDEIEEEDYD  | 1     |
| 54MNKKGKGIARKKGGK   | 1     |
| 35LFDKGNISILETSEES  | 1     |
| 138SGESGELEEEPIESNE | 1     |
| 249LDNFAKAKAKEEAAK  | 1     |
| 108LKEQSETRKEKIQKQ  | 0.993 |
| 88KSNFLQKNVILEEES   | 0.985 |
| 19SCDLFIRYEMKEESP   | 0.975 |
| 70KVSRRKPYIHSKLRD   | 0.891 |
| 212YLEGVKYNVDSAIQT  | 0.786 |
| 287AANFVYINDTHAKRK  | 0.751 |

LGLLFGFISCDLFIRY  
LLNYIQVSVKT

>borr|O51549

>borr|O51549

>borr|O51549

>borr|O51549

|                    |       |
|--------------------|-------|
| 443LAAANTTGATGGKMI | 1     |
| 459PQNITIATTTAGLIG | 0.999 |
| 112GFGNFLEGVAGYGTA | 0.999 |
| 389ANGISIITGKFGPLF | 0.992 |
| 421SNVLFGLQTQMAEN  | 0.972 |
| 337TTISYSIRGVPMLKQ | 0.899 |
| 254YARFFGNKETTERQS | 0.893 |
| 152NTSSTAYGSGVGPIT | 0.891 |
| 57MLEGALMGIWPIATV  | 0.739 |
| 311TISIYPEANPLHFKW | 0.713 |

114GNFLEGVAGYGTAVAI

|                    |            |       |
|--------------------|------------|-------|
| 259GNKETTERQSKNTIS | 0.75509297 | 75.17 |
| 261KETTERQSKNTISLS | 0.90013736 | 80.00 |

LVPIILIIIGLGII  
FQLILPTLTIPFVLVILTGGG  
KGLKGVFLLTLLSG  
ISQVFISKTL  
CSPYILIVTFIVLVSPLEN  
LSSFIIICIV  
TVSNVLEGLPQ

|                                  |                            |                                     |                              |
|----------------------------------|----------------------------|-------------------------------------|------------------------------|
| >borr O51754                     | >borr O51754               | >borr O51754                        | >borr O51754                 |
| 320 <b>IFIYKEDLKEDVKIG</b> 0.965 | 66QRLNRESKKINAINII         | LHQGLGKKEAKEKAI 0.75912875 75.30    | VYKYGLSFILL                  |
| 174 <b>LDLGGGINNLFKTAT</b> 0.946 |                            | LVVNFFCKKNSKVCX 0.78938911 76.31    | QIPTTLIVFIIVGQRL             |
| 430FLVVNFFCKKNSKVC 0.745         |                            | VVNFFCKKNSKVCXX 0.80326038 76.78    | LMSGFVLIFFSM                 |
|                                  |                            | HQGLGKKEAKEKAIE 0.92356882 80.79    | WGIDYVVGLTFF                 |
|                                  |                            |                                     | FLVFIYVFFGG                  |
|                                  |                            |                                     | QGFLMLVSSVILFSKML            |
|                                  |                            |                                     | LDKSLLLPSN                   |
|                                  |                            |                                     | LKPQYIISFWILIGIL             |
|                                  |                            |                                     | IKFSLPISTFIISFLIVLMHLIG      |
|                                  |                            |                                     | IILFPDLSPNDKVVLNV            |
|                                  |                            |                                     | LKVLNPFSCFMFFIGLLS           |
|                                  |                            |                                     | VDSNLLLITSVLIKSIFIY          |
|                                  |                            |                                     | NIFFILILIFSLFPP              |
|                                  |                            |                                     | LEVSFPIIVFGLYLNPFVSK         |
|                                  |                            |                                     | FLGLIFYLSILFFGL              |
|                                  |                            |                                     | IWFFHPVFPSEFFVSIFTFLVVNFFCKK |
| >borr H7C7Q3                     | >borr H7C7Q3               | >borr H7C7Q3                        | >borr H7C7Q3                 |
| 126 <b>LGGKKEAKEKAIEMLK</b> 1    | 38 <b>IRAIVGESGSGKSVT</b>  |                                     | HTTIHPVSNVNLVSVKR            |
| 236 <b>IVEEGTVEEIFNNPK</b> 1     |                            |                                     | ILKLLPELTV                   |
| 21 <b>TTIHPVSNVNLVSVKR</b> 0.998 |                            |                                     | IQEILLIKNLS                  |
| 89KIRGNKISMIFQDPM 0.915          |                            |                                     | ICDTSVVMYQG                  |
| 73LFENQDLLKSEKEL 0.898           |                            |                                     | PYTIGLLKSILT                 |
| 181 <b>ADEPTALDVTIQEQ</b> 0.847  |                            |                                     |                              |
| 41 <b>IVGESGSGKSVTMA</b> 0.798   |                            |                                     |                              |
| 220VVAEICDTSVVMYQG 0.783         |                            |                                     |                              |
| borr Q9S0D9                      | borr Q9S0D9                | borr Q9S0D9                         | borr Q9S0D9                  |
| 128 <b>LKKKKEERKKALQEA</b> 1     | 127 <b>SLKKKKEERKKALQE</b> | 209EEELKNIGETVEGKK 0.77297511 75.77 |                              |
| 185 <b>KNMTSGNNTSDMTNE</b> 1     |                            | 20CKNDVTSKDLEGAVK 0.78709615 76.24  |                              |
| 62ETKDLNLTDTKEIEK 1              |                            |                                     |                              |

|                    |       |                    |                     |              |       |              |
|--------------------|-------|--------------------|---------------------|--------------|-------|--------------|
| 33VKDLESSEQNVKCKTE | 1     |                    |                     |              |       |              |
| 158GVTHGSQVQRQGGVG | 0.995 |                    |                     |              |       |              |
| 112LNGKLEDKLNELSE  | 0.953 |                    |                     |              |       |              |
| 96ETYSGYEEKINKIKE  | 0.909 |                    |                     |              |       |              |
| 17ISSCKNDVTSKDLEG  | 0.822 |                    |                     |              |       |              |
| >borr Q9S036       |       | >borr Q9S036       |                     | >borr Q9S036 |       | >borr Q9S036 |
| 74GDLVVRKEENGIDTG  | 1     | 161KINNGVGGDKTAEYA | 36HTLYDEQSNGLK      | 0.76802173   | 75.60 | MKMFIVCAVFI  |
| 36HTLYDEQSNGLK     | 1     |                    | 25SYDEQSSGEINHTLY   | 0.78338859   | 76.11 |              |
| 163NNGVGGDKTAEYAIP | 1     |                    | 37TLYDEQSNGLK       | 0.94031402   | 81.34 |              |
| 20CKIHITSYDEQSSGEI | 0.999 |                    |                     |              |       |              |
| 58TVKIKNKDNNNSNWD  | 0.984 |                    |                     |              |       |              |
| 128KYEQSSANGIQNKEI | 0.981 |                    |                     |              |       |              |
| 93GHSATFFSLKESEVN  | 0.935 |                    |                     |              |       |              |
| >borr O50889       |       | >borr O50889       |                     | >borr O50889 |       | >borr O50889 |
| 72NNQNLNESQNSKSS   | 1     |                    | 168EILEKLDTEENRRRI  | 0.77847742   | 75.95 | KYSHPLYLLDQ  |
| 104KDLEAQKKEKDTQIE | 1     |                    | 145KMTLKKIYSSLNIE   | 0.79154777   | 76.38 |              |
| 56NLKKTNSHTNSNSA   | 0.998 |                    | 147TLKKIYSSLNIEKE   | 0.82541645   | 77.51 |              |
| 25CAPFGVNPKNLKNP   | 0.997 |                    | 167KEILEKLDTEENRR   | 0.86798672   | 78.93 |              |
| 205IQDTLQTLSEKAE   | 0.996 |                    | 144TKMTLKKIYSSLNIE  | 0.92961065   | 80.99 |              |
| 121SSDAQYDFLENFKLH | 0.994 |                    | 146MTLKKIYSSLNIEK   | 0.94810304   | 81.60 |              |
| 165TLKEILEKLDTEEN  | 0.979 |                    |                     |              |       |              |
| >borr H7C7N5       |       | >borr H7C7N5       |                     | >borr H7C7N5 |       | >borr H7C7N5 |
| 81HSATFFSLEEEIEIN  | 1     |                    | 115NDEESDKNVIKNIKEI | 0.75842571   | 75.28 |              |
| 61GDLVVRKEKDIETG   | 1     |                    |                     |              |       |              |
| 149INNSAGGDKIAEYAI | 0.998 |                    |                     |              |       |              |
| 22IHITSYDEQSNGEVKV | 0.997 |                    |                     |              |       |              |
| 109SLYYGYNDEESDKNV | 0.988 |                    |                     |              |       |              |
| 126NKEIKTKIEKINDTE | 0.961 |                    |                     |              |       |              |
| 45TVKIKNKNNNSNNWAD | 0.926 |                    |                     |              |       |              |
| >borr H7C7M3       |       | >borr H7C7M3       |                     | >borr H7C7M3 |       | >borr H7C7M3 |

|                     |       |                     |                    |            |       |                   |
|---------------------|-------|---------------------|--------------------|------------|-------|-------------------|
| 131LAKKKGERKKALQEA  | 1     | 91LDSKKTSIETYSEYEE  | 157DTSTGKTQGDRSKNR | 0.76260593 | 75.42 |                   |
| 28NLKNSEQNLESSEQN   | 1     | 190SYNSNGGSDNSNTDEL | 118KGLEDKFKEEESLA  | 0.77320037 | 75.77 |                   |
| 68KLDEKDTKEIEKQIQ   | 1     |                     | 158TSTGKTQGDRSKNRG | 0.8894998  | 79.65 |                   |
| 190SYNSNGGSDNSNTDEL | 1     |                     | 115LKGGLEDKFKELEE  | 0.892702   | 79.76 |                   |
| 215KIEEELKGIEEDKKE  | 1     |                     | 117KGLEDKFKEEESL   | 0.92622531 | 80.87 |                   |
| 150EEYKKQVDTSTGKTQ  | 0.999 |                     | 116KGGLEDKFKEEES   | 10.826.641 | 86.09 |                   |
| 44KKTEQEIKKQVEGFL   | 0.998 |                     |                    |            |       |                   |
| 103EYEEKINKIKEKLG   | 0.992 |                     |                    |            |       |                   |
| 170NRGGVGVQAWQCANE  | 0.75  |                     |                    |            |       |                   |
| >borr H7C7L6        |       | >borr H7C7L6        | >borr H7C7L6       |            |       | >borr H7C7L6      |
| 106GEESKEDEEENEQAV  | 1     | 290KKYYAHENEPPLKEN  | 60FLEKILDPVKDKIAS  | 0.79674766 | 76.56 | MKIFIICAVFVLISCKI |
| 144KKETEDEDKKEIEK   | 1     |                     | 61LEKILDPVKDKIASN  | 0.80441601 | 76.81 |                   |
| 174EEKRKKQEQQEKK    | 1     |                     | 62EKILDPVKDKIASNG  | 0.7656647  | 75.52 |                   |
| 87QEEKVNNGEEENDK    | 1     |                     | 63KILDPVKDKIASNGP  | 0.78276353 | 76.09 |                   |
| 254KTWGDLEDEEGEGLG  | 1     |                     | 64ILDVPVKDKIASNGPI | 0.81575207 | 77.19 |                   |
| 192QEQRKERRAKNKK    | 1     |                     | 87QEEKVNNGEEENDK   | 0.76835132 | 75.61 |                   |
| 32KDATGKDATGKDATG   | 1     |                     | 94NGEEENDKAVFLGEE  | 0.8448654  | 78.16 |                   |
| 237TGPVYDYFTDDNKA   | 1     |                     | 95GEEENDKAVFLGEES  | 0.9948177  | 83.16 |                   |
| 128EEDKKVVNLEEKELE  | 1     |                     | 96EEENDKAVFLGEESK  | 0.99212638 | 83.07 |                   |
| 295HENEPPLKENVDVSE  | 1     |                     | 97EENDKAVFLGEESKE  | 1.017.961  | 83.93 |                   |
| 322EKVKEYLKDNSKFEE  | 1     |                     | 98ENDKAVFLGEESKED  | 10.184.448 | 83.95 |                   |
| 66DPVKDKIASNGPIAD   | 0.967 |                     | 99NDKAVFLGEESKEDE  | 0.96597235 | 82.20 |                   |
|                     |       |                     | 100DKAVFLGEESKEDEE | 0.75015229 | 75.01 |                   |
|                     |       |                     | 118QAVNLEEKNAEEDKK | 10.336.785 | 84.46 |                   |
|                     |       |                     | 144KKETEDEDKKEIEK  | 0.75101772 | 75.03 |                   |
|                     |       |                     | 145KETEDEDKKEIEKQ  | 0.84667633 | 78.22 |                   |
|                     |       |                     | 146ETEDEDKKEIEKQK  | 0.79652256 | 76.55 |                   |
|                     |       |                     | 147TEDEDKKEIEKQKQ  | 0.86577016 | 78.86 |                   |
|                     |       |                     | 148EEDEDKKEIEKQKQE | 0.76728392 | 75.58 |                   |
|                     |       |                     | 289NKKYYAHENEPPLKE | 0.84702128 | 78.23 |                   |

|                    |              |                     |                    |            |       |                     |
|--------------------|--------------|---------------------|--------------------|------------|-------|---------------------|
|                    |              |                     | 324VKEYLKDNSKFEEIK | 0.81312362 | 77.10 |                     |
|                    |              |                     | 325KEYLKDNSKFEEIKG | 0.81276643 | 77.09 |                     |
|                    |              |                     | 326EYLKDNSKFEEIKGY | 1.006.064  | 83.54 |                     |
|                    |              |                     | 327YLKDNSKFEEIKGYI | 0.83585083 | 77.86 |                     |
|                    |              |                     | 328LKDNSKFEEIKGYIS | 0.8517448  | 78.39 |                     |
|                    |              |                     | 329KDNSKFEEIKGYISY | 0.86483825 | 78.83 |                     |
|                    |              |                     | 331NSKFEEIKGYISYSQ | 0.8713334  | 79.04 |                     |
| >borr Q07337       | >borr Q07337 | >borr Q07337        | >borr Q07337       |            |       | >borr Q07337        |
| 196KELTSPPVAESPCKP | 1            |                     | 109KQKLDGLKNEGLKEK | 0.75040051 | 75.01 | ILMTLFLFISCN        |
| 20NNSGKDGNTSANSAD  | 1            |                     | 126AAKCCSETFTNKLKE | 0.7508158  | 75.03 |                     |
| 84NNGLDTENNHNGSL   | 1            |                     | 128KKCSETFTNKLKEKH | 0.76492075 | 75.50 |                     |
| 137KLKEKHTDLGKEGVT | 0.999        |                     | 73AAKAIGKKIHQNNGL  | 0.77240396 | 75.75 |                     |
| 156KEAILKTNGTKTKGA | 0.783        |                     | 133TFTNKLKEKHTDLGK | 0.78491299 | 76.16 |                     |
| 50TDSNAVLLAVKEVEA  | 0.741        |                     | 131SETFTNKLKEKHTDL | 0.80105519 | 76.70 |                     |
|                    |              |                     | 132ETFTNKLKEKHTDLG | 0.80349346 | 76.78 |                     |
|                    |              |                     | 127AKCSETFTNKLKEK  | 0.82018352 | 77.34 |                     |
|                    |              |                     | 162TNGTKTKGAEELGKL | 0.82279167 | 77.43 |                     |
|                    |              |                     | 69IDEIAAKAIGKKIHQ  | 0.83999406 | 78.00 |                     |
|                    |              |                     | 70DEIAAKAIGKKIHQN  | 0.87997758 | 79.33 |                     |
|                    |              |                     | 72IAAKAIGKKIHQNG   | 0.92473753 | 80.82 |                     |
|                    |              |                     | 71EIAAKAIGKKIHQNN  | 0.96549353 | 82.18 |                     |
|                    |              |                     | 167TKGAEELGKLFESVE | 0.96685632 | 82.23 |                     |
|                    |              |                     | 168KGAEELGKLFESVEV | 0.99035508 | 83.01 |                     |
|                    |              |                     | 104ISTLIKQKLDGLKNE | 0.99963839 | 83.32 |                     |
|                    |              |                     | 105STLIKQKLDGLKNEG | 11.464.492 | 88.21 |                     |
| >borr POCL66       | >borr POCL66 | >borr POCL66        | >borr POCL66       |            |       | >borr POCL66        |
| 212KTAAWNSGTSTLTIT | 1            | 242TITVQQYDSNGTKLEG | 104EDGKTLVSKKVTSKD | 0.89092529 | 79.70 | NSVSVDLPGEMKVLVSKEK |
| 189KNISKSGEVSVELND | 1            |                     | 105DGKTLVSKKVTSKDK | 0.88289108 | 79.43 | EVLKGYVLEGTL        |
| 146EYTGIKSDGSGKAKE | 1            |                     | 106GKTLVSKKVTSKDKS | 12.235.957 | 90.79 | EKTTLVVKEGTV        |
| 120SSTEKFNEKGEVSE  | 1            |                     | 107KTLVSKKVTSKDKSS | 104.253    | 84.75 |                     |

|                     |              |                    |                    |            |       |                         |
|---------------------|--------------|--------------------|--------------------|------------|-------|-------------------------|
| 18KQNVSSLDEKNSVSV   | 1            |                    | 108TLVSKKVTSKDKSST | 0.87055585 | 79.02 |                         |
| 40VLVSKEKNKDGKYDL   | 1            |                    | 151KSDGSGKAKEVLKGY | 0.84758459 | 78.25 |                         |
| 245VQQYDSNGTKLEGSA  | 0.999        |                    | 156GKAKEVLKGYVLEGT | 0.83084155 | 77.69 |                         |
| 65GTSKNNNGSGVLEGV   | 0.996        |                    | 226TVNSKKTDLVFTKE  | 0.7650685  | 75.50 |                         |
|                     |              |                    | 227VNSKKTDLVFTKEN  | 0.92821303 | 80.94 |                         |
|                     |              |                    | 228NSKKTDLVFTKENT  | 0.87439684 | 79.15 |                         |
|                     |              |                    | 229SKKTDLVFTKENTI  | 0.905088   | 80.17 |                         |
| >borr O51585        | >borr O51585 | >borr O51585       | >borr O51585       |            |       | >borr O51585            |
| 98SVNKITHINPDIVTG   | 1            |                    | 205FTTGQGFNLSILIN  | 0.79375533 | 76.46 | NIFLFLILSFIYLPILIIYSF   |
| 26IYSFNSGDSGFIWQG   | 0.999        |                    |                    |            |       | ISSLTSVVIGIIG           |
| 158IIDAADKDLGASEIQI | 0.983        |                    |                    |            |       | KLKTILLSVNKI            |
| 174FNIIYPEIAGSIATG  | 0.751        |                    |                    |            |       | MLISHIFSTPYVVIILPKLYSLP |
|                     |              |                    |                    |            |       | ILFFTILSLLFIIN          |
| >borr O51735        | >borr O51735 | >borr O51735       | >borr O51735       |            |       | >borr O51735            |
| 613LSAAWDTRNSTLSLN  | 1            | 248TVDIKDSLKDSKRLE | 35INFEGLNKKERDFI   | 0.84434029 | 78.14 | IRGLFFVVSFLIFFVVFSFGQV  |
| 435GFGMNFSGNSNSFFP  | 1            | 437GMNFGGNSNSFFPS  | 36NFEGLNKKERDFIN   | 0.84434029 | 78.14 | LFITFIVKEKSLVNSVVFSDSS  |
| 523REVPDPFTSWEEYRD  | 0.999        | 612LSAAWDTRNSTLSLN | 37FEGLNKKERDFINI   | 0.92362698 | 80.79 | GPKYVVKGIDF             |
| 405SNVIPDIVPGNTEGL  | 0.998        | 658NILPPLGNGFEIEIQ | 39GLNKKERDFINILK   | 10.441.345 | 84.80 | LEKEVFLKYFLS            |
| 751ASYSLEGQENSLFRP  | 0.997        |                    | 40LNKKERDFINILKP   | 0.91013272 | 80.34 | EFVDLLIKILE             |
| 793PFYFDNDKVNYYKY   | 0.991        |                    | 41KNKKERDFINILKPY  | 0.92097135 | 80.70 | LQQLGYFSNVIPDIVP        |
| 557GAFTGYTFSNYLGKQ  | 0.984        |                    | 42NKKERDFINILKPYI  | 0.87300201 | 79.10 | PYFDIILTLRSVYSNLP       |
| 103SLVNSVVFSDSSRVF  | 0.98         |                    | 45ERDFINILKPYIGVS  | 0.81234364 | 77.08 | FVNTVQISIPLLKNILVW      |
| 687LPLGNGFEIEIQPH   | 0.971        |                    | 46RDFINILKPYIGVSY  | 0.97178325 | 82.39 | IRSLLPQLPLSFVI          |
| 323YFREGYIFTEIIPSQ  | 0.964        |                    | 47DFINILKPYIGVSY   | 0.90445043 | 80.15 |                         |
| 586YDNEVNRPSNYLRD   | 0.961        |                    | 48FINILKPYIGVSYSN  | 0.86311634 | 78.77 |                         |
| 172DIIFNIVAGPKYVVK  | 0.95         |                    | 49INILKPYIGVSYSN   | 10.087.443 | 83.62 |                         |
| 129KTNEPLNLASVNKGI  | 0.936        |                    | 50NILKPYIGVSYSN    | 10.181.152 | 83.94 |                         |
| 480SLSLTFRDNWFQKR   | 0.926        |                    | 51ILKPYIGVSYSN     | 0.86486221 | 78.83 |                         |
| 504SHSVNTAYQDINGPI  | 0.908        |                    | 52LKPYIGVSYSN      | 0.79122717 | 76.37 |                         |
| 33KGINFEGLNKKERD    | 0.871        |                    | 53KPYIGVSYSN       | 0.79506057 | 76.50 |                         |

|                            |              |                             |                             |              |              |                            |
|----------------------------|--------------|-----------------------------|-----------------------------|--------------|--------------|----------------------------|
| 250 <b>DIKDSLKDSKRLEKE</b> | 0.87         |                             | 54 <b>PYIGVSY SNEIFDKL</b>  | 0.81263473   | 77.09        |                            |
| 230 <b>LESFYKNNGYIDVKI</b> | 0.812        |                             | 127 <b>NIKTNEPLNLASV NK</b> | 0.76656463   | 75.55        |                            |
| 146 <b>LEEMYKDMGYLEVSA</b> | 0.796        |                             | 212 <b>LFSDGKYLKSNVDKD</b>  | 0.79651468   | 76.55        |                            |
| 283 <b>EISGNSVFSLEELKS</b> | 0.768        |                             | 216 <b>GKYLKSNVDKDKRQL</b>  | 0.79341435   | 76.45        |                            |
| 389 <b>DKFKMGMANLQQLGY</b> | 0.768        |                             | 240 <b>IDVKIINSTVDIKDS</b>  | 11.002.874   | 86.68        |                            |
| 539 <b>KSFSDFNAMNYSLLK</b> | 0.727        |                             | 334 <b>IPSQKIRGEFVDLLI</b>  | 0.79587598   | 76.53        |                            |
|                            |              |                             | 515 <b>NGPIFSGKREVPDPF</b>  | 0.87383936   | 79.13        |                            |
|                            |              |                             | 516 <b>GPIFSGKREVPDPFT</b>  | 0.85011654   | 78.34        |                            |
|                            |              |                             | 522 <b>KREVPDPFTSWEEYR</b>  | 0.77470891   | 75.82        |                            |
| >borr O51695               | >borr O51695 | >borr O51695                | >borr O51695                | >borr O51695 | >borr O51695 | >borr O51695               |
| 25 <b>EEGEVLGILGPNGAG</b>  | 0.995        | 152 <b>VILDEPTNGLDPNQII</b> | 24 <b>VEEGEVLGILGPNGA</b>   | 0.80683807   | 76.89        | STLIKILTSFHY               |
| 230 <b>VSKKSENEKKIFNSK</b> | 0.985        |                             | 32 <b>ILGPNGAGKSTLIKI</b>   | 0.8333108    | 77.78        | LYPELSVKEYL                |
| 153 <b>ILDEPTNGLDPNQII</b> | 0.981        |                             | 33 <b>LGPNAGKSTLIKIL</b>    | 0.8333108    | 77.78        | ILFSSHILSEVESICKRIIVNNGVIV |
| 249 <b>SLIKLEEHEKDLNIS</b> | 0.788        |                             |                             |              |              | IEIELIVSKKS                |
| 64 <b>DIVEHSKEILQQIGY</b>  | 0.757        |                             |                             |              |              |                            |
| 7 <b>VTKMYGPFTALFNVS</b>   | 0.708        |                             |                             |              |              |                            |
