# Supplementary figures and images for: Omics and bioinformatics applied to vaccine development against Borrelia
Source: Royal Society of Chemistry journal article supplement (doi:10.1039/c8mo00130h), 2018-08-03

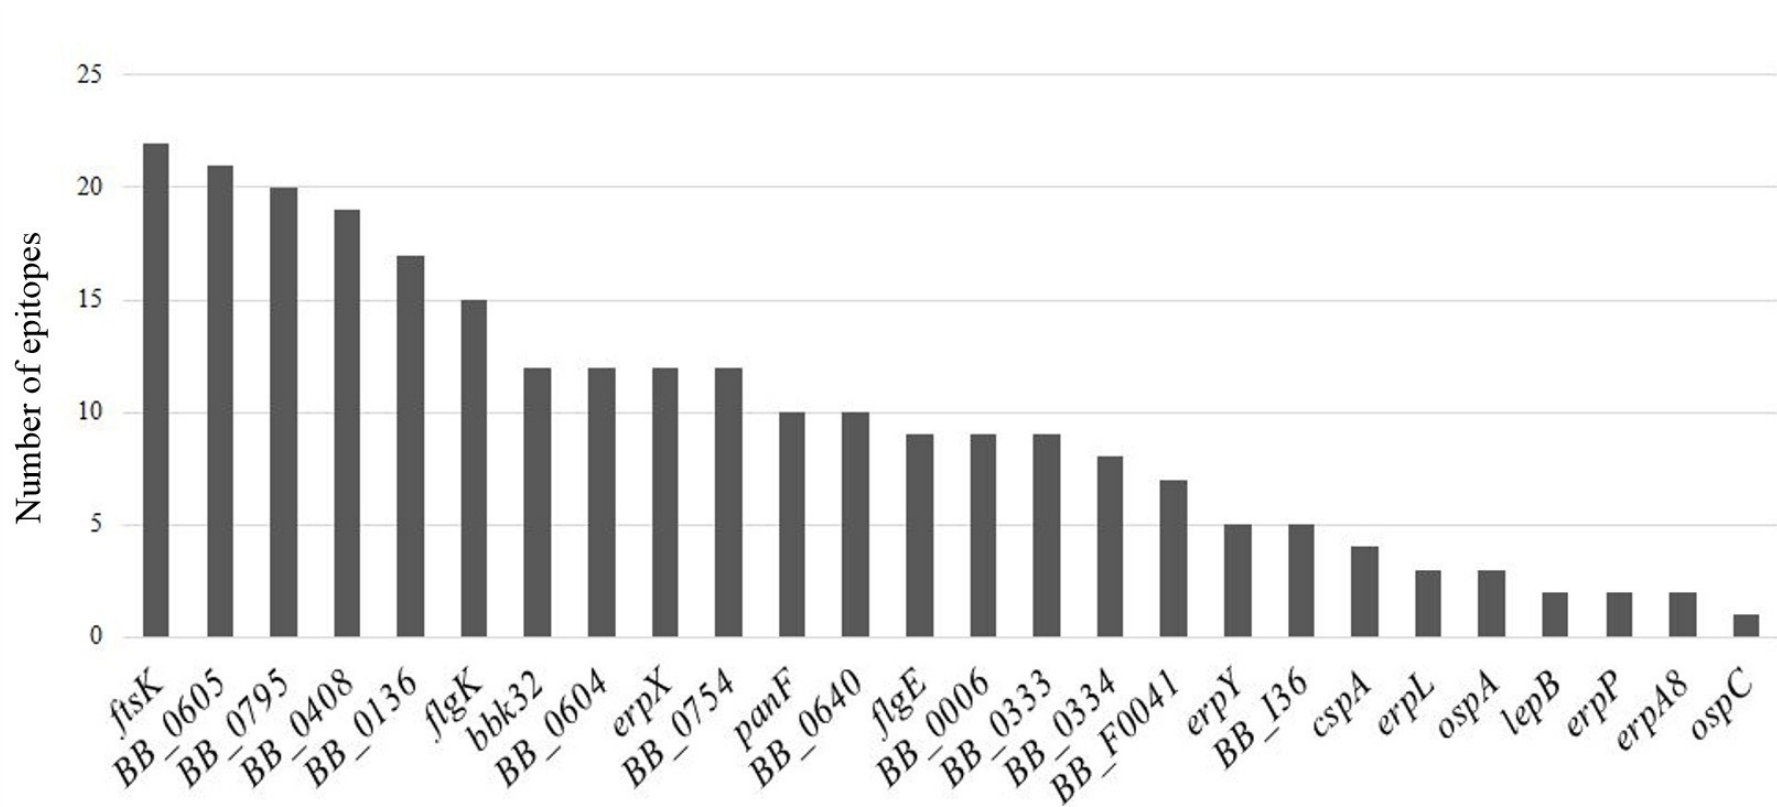

Supplement: c8mo00130h1.pdf [file c8mo00130h1.pdf]
